# Supplementary material
Source: PubMed Central journal article supplement (PMC8162838)
Supplement: NIHMS1701314-supplement-Figure_S1.pdf [file NIHMS1701314-supplement-Figure_S1.pdf]

**Figure S1.** Multivariate  $\pm$  Risk of Liver-Related Mortality according to Waist Circumference (WC) and Physical Activity Level

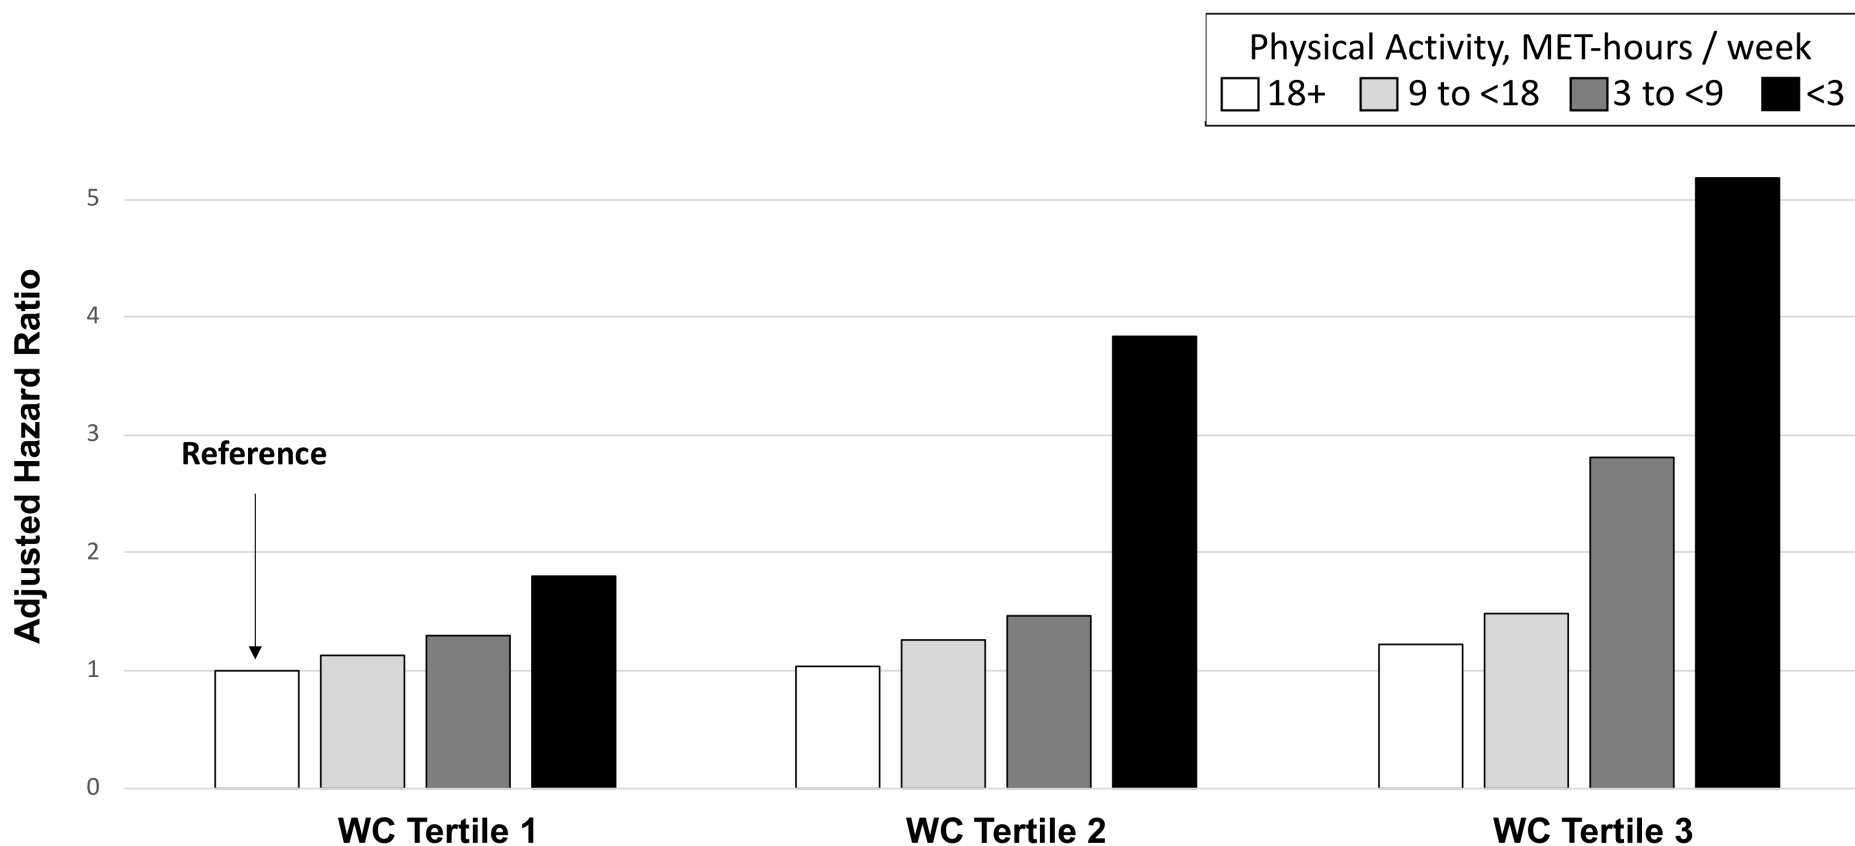

Each column shows the multivariable-adjusted hazard ratio for the joint association of the waist circumference (WC, in tertiles) and physical activity (in categories of metabolic equivalent task hours per week) on the risk of liver-related mortality.

Abbreviations: WC, waist circumference; MET-hours /week, metabolic equivalent task hours per week; HR, hazard ratio.

$\pm$  Multivariable adjusted Cox proportional hazards regression model conditioned on age (years), sex and year of questionnaire return, that further accounted for time-updated covariates (see footnotes to Table 2). Exposure variables included cumulative average updated WC and physical activity, with an 8-year latency period, as outlined in the Methods.
